# Supplementary material
Source: PubMed Central journal article supplement (PMC3624560)
Supplement: JB.02131-12_zjb999092515so1.pdf [file JB.02131-12_zjb999092515so1.pdf]

# Expression of *kinA* and *kinB* of *Bacillus subtilis*, Necessary for Sporulation Initiation, Is under Positive Stringent Transcription Control

## Supplemental material

Files in this Data Supplement:

\*Supplemental file 1 – Table S1, Oligonucleotide primers used in this study.  
Fig. S1, *In situ* replacement of adenine with guanine at nucleotide +1 of the *kinA* promoter.

**Table S1.** Oligonucleotide primers used in this study

| Oligo-nucleotide | Sequence <sup>a</sup>                                |
|------------------|------------------------------------------------------|
| ABu-F            | gtgaaaacaccgtctgatccgaa                              |
| ABu-R            | gcactatcaacacactcttaagaaacattctctccaagacatt          |
| ABd-F            | ggagctaaagaggtcctagcttaataatcatttctgtacaaaa          |
| ABd-R            | cgcaagacatgaaatccactgca                              |
| EM-F             | cttaagagtgtgtgatagtc                                 |
| EM-R             | ctaggacactcttagctcc                                  |
| KA-F1            | gtgtctagattgacgttcaccataagaata                       |
| KA-R1            | gtggatccactttaccTagtatgattcg                         |
| KA-R1g           | gtggatccactttaccCagtatgattcg                         |
| KA-R1c           | gtggatccactttaccGagtatgattcg                         |
| KB-F1            | gtgtctagatcttaataaaggaatttatat                       |
| KB-R1            | gtggatcctataaaataTgaatctattataa                      |
| KB-R1g           | gtggatcctataaaataCgaatctattataa                      |
| KB-R1c           | gtggatcctataaaataGgaatctattataa                      |
| MF-F             | cgacagcggaattgactcaagc                               |
| MF-R             | cgcgatcctaccaatcagtaacgtaatttg                       |
| KA-F2            | ctctcgcaaagacaaaaaat                                 |
| KA-R2g           | ctgattggtaggatccgcatgactttaccCagtatgattcgc           |
| KA-F3g           | gagtcaattccgctgtcgggcaatcactGggtaaaagtcaat           |
| KA-R3            | ggtttgatccccgttatataa                                |
| KB-F2            | gatcggcagcgtttgtcaaaa                                |
| KB-R2g           | ctgattggtaggatccgcttcgtataaaataCgaatctattataaacactaa |
| KB-F3g           | gagtcaattccgctgtcgggtataatagattcGtattttatacga        |

KB-R3        cacatccgcctgttttggatga  
KA-R2c       ctgattgggtaggatccgcattgacttttaccGagtatgattcgc  
KA-F3c        gagtcaattccgctgtcgggcaatcactCggtaaaagtcaat  
KB-R2c        ctgattgggtaggatccgcttcgtataaaataGgaatctattataacactaa  
KB-F3c        gagtcaattccgctgtcggttataatagattcCtattttatacgaa

---

<sup>a</sup> The underlined 26- and 27 base-sequences of the *kinA* and *kinB* short repeated regions have the respective transcription initiation bases where the replacement of adenine with guanine or cytosine was performed. Bases corresponding to nucleotide +1 are in capitals.

Fig. S1.

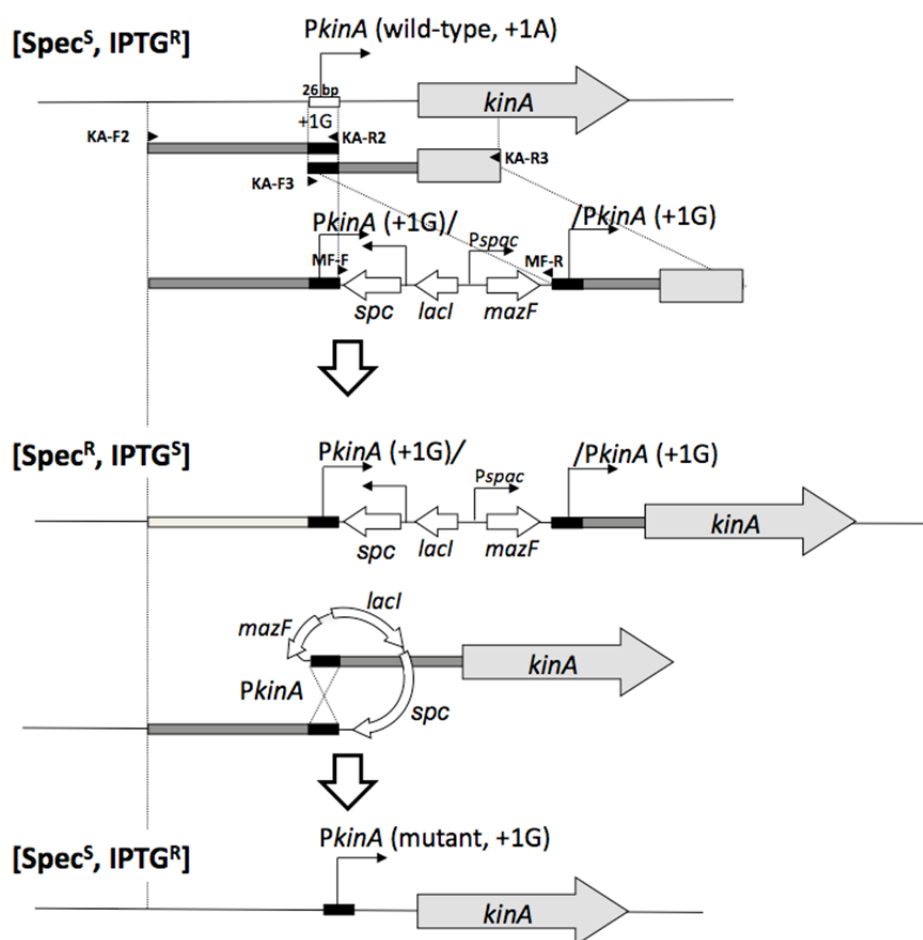

**Fig. S1.** *In situ* replacement of adenine with guanine at nucleotide +1 of the *kinA* promoter. The guanine replacement of adenine at nucleotide +1 of the *kinA* promoter was performed in three steps. First, the *kinA* promoter regions upstream and downstream of the transcription initiation site, both having the guanine replacement of adenine at nucleotide +1, and the *mazF* cassette possessing the spectinomycin-resistance gene (*spc*), *lacI*, and *mazF* under the control of the *P<sub>spac</sub>* promoter (1) were separately amplified by PCR, and were combined by the subsequent PCR using the most outside primer pair. Secondly, strain 168 [spectinomycin-sensitive (Spec<sup>S</sup>), IPTG-resistant (IPTG<sup>R</sup>)] was transformed with the above combined PCR product to yield cells [Spec-resistant (Spec<sup>R</sup>), IPTG-sensitive (IPTG<sup>S</sup>)]. Thirdly, one colony

of the cells (Spec<sup>s</sup>, IPTG<sup>r</sup>) resulting from a single-crossover to pinch off the *mazF* cassette was designated as the *kinA* (A+1G) strain FU1102. Details of the isolation of this strain are given in Materials and Methods. The *kinB* (A+1G) strain FU1113 and the *kinA* (A+1C) strain FU1156 were similarly constructed by the above three-step procedure using the *mazF* gene.

## Reference

1. Morimoto, T., K. Ara, K. Ozaki, and N. Ogasawara. 2009. A new simple method to introduce marker-free deletions in the *Bacillus subtilis* genome. *Genes Genet. Syst.* **84**: 315-318.
